# Supplementary material for: Mechanistic Model for the Coexistence of Nitrogen Fixation and Photosynthesis in Marine Trichodesmium
Source: PubMed Central journal article supplement (PMC6687940; doi:10.1128/msystems.00210-19), 2019-08-06
Supplement: mSystems.00210-19-s0001.pdf [file mSystems.00210-19-s0001.pdf]

## 1 Supplementary Methods

2 Here we describe some details of the model. A list of parameters with units is provided in Table  
3 S1 below. Also, values for fixed and adjustable parameters are summarized in Table S2 and S3  
4 respectively.

5

6 **Computing concentrations and fluxes of O<sub>2</sub>.** Under the pseudo-steady state, the time  
7 variation terms in [eq. 11] ~ [eq. 13] becomes zero. Thus,

$$0 = -J_{O_2}^{PB} - J_{O_2}^{PN} + (F_{Cfix} - F_{Res}^P)Y^{O_2:C} \quad [\text{eq. S1}]$$

$$0 = J_{O_2}^{PN} + J_{O_2}^{BN} - F_{Res}^N Y^{O_2:C} \quad [\text{eq. S2}]$$

$$0 = -J_{O_2}^{BE} + J_{O_2}^{PB} - J_{O_2}^{BN} \quad [\text{eq. S3}]$$

8 since  $J_{O_2}^{ij} = A_{ij}([O_2]_i - [O_2]_j)$  with  $i, j = P, N, B, E$ , equation [eq. S1] ~ [eq. S3] are expanded  
9 to

$$0 = -A_{PB}([O_2]_P - [O_2]_B) - A_{PN}([O_2]_P - [O_2]_N) + (F_{Cfix} - F_{Res}^P)Y^{O_2:C} \quad [\text{eq. S4}]$$

$$0 = A_{PN}([O_2]_P - [O_2]_N) + A_{BN}([O_2]_B - [O_2]_N) - F_{Res}^N Y^{O_2:C} \quad [\text{eq. S5}]$$

$$0 = -A_{BE}([O_2]_B - [O_2]_E) + A_{PB}([O_2]_P - [O_2]_B) - A_{BN}([O_2]_B - [O_2]_N) \quad [\text{eq. S6}]$$

10 Given intracellular oxygen is small for non-photosynthetic cells ( $[O_2]_N \sim 0$ ) and O<sub>2</sub> in the  
11 environment ( $[O_2]_E$ ) is constant, we solve [eq. S4]~[eq. S6] for  $[O_2]_P$ ,  $[O_2]_B$  and  $F_{Res}^N$ ;

$$[O_2]_P = \frac{aA_{PB} + aA_{BN} + aA_{BE} + A_{PB}A_{BE}[O_2]_E}{A_{PN}A_{PB} + A_{PN}A_{BN} + A_{PB}A_{BN} + A_{PN}A_{BE} + A_{PB}A_{BE}} \quad [\text{eq. S7}]$$

$$[O_2]_B = \frac{aA_{PB} + A_{PN}A_{BE}[O_2]_E + A_{PB}A_{BE}[O_2]_E}{A_{PN}A_{PB} + A_{PN}A_{BN} + A_{PB}A_{BN} + A_{PN}A_{BE} + A_{PB}A_{BE}} \quad [\text{eq. S8}]$$

$$F_{Res}^N = \frac{aA_{PN}A_{PB} + aA_{PN}A_{BN} + aA_{PB}A_{BN} + aA_{PN}A_{BE} + A_{PN}A_{PB}A_{BE}[O_2]_E + A_{PN}A_{BN}A_{BE}[O_2]_E + A_{PB}A_{BN}A_{BE}[O_2]_E}{Y^{O_2:C}(A_{PN}A_{PB} + A_{PN}A_{BN} + A_{PB}A_{BN} + A_{PN}A_{BE} + A_{PB}A_{BE})} \quad [\text{eq. S9}]$$

12 where  $a = (F_{Cfix} - F_{Res}^P)Y^{O_2:C}$ . To test whether  $F_{Res}^N$  is supported by the maximum possible  
 13 respiration rate based on available carbon storage

$$F_{Res}^{Nmax} = F_{Res}^{NmaxC} f_N \frac{C_{Sto}^N}{C_{Sto}^N + K_C} \quad [\text{eq. S10}]$$

14 we compare  $F_{Res}^N$  and  $F_{Res}^{Nmax}$ . If  $F_{Res}^N$  is greater than  $F_{Res}^{Nmax}$ , we replace a value of  $F_{Res}^N$  with

15  $F_{Res}^{Nmax}$  and solve [eq. S4]~[eq. S6], this time, for  $[O_2]_P$ ,  $[O_2]_N$  and  $[O_2]_B$ :

$$[O_2]_P = \frac{(aA_{PN}A_{PB} + aA_{PN}A_{BN} + aA_{PB}A_{BN} + aA_{PN}A_{BE} + aA_{BN}A_{BE} + A_{PN}A_{PB}b + A_{PN}A_{BN}b + A_{PB}A_{BN}b + A_{PN}A_{BE}b + A_{PN}A_{PB}A_{BE}[O_2]_E + A_{PN}A_{BN}A_{BE}[O_2]_E + A_{PB}A_{BN}A_{BE}[O_2]_E)}{((A_{PN}A_{PB} + A_{PN}A_{BN} + A_{PB}A_{BN})A_{BE})} \quad [\text{eq. S11}]$$

$$[O_2]_N = \frac{(aA_{PN}A_{PB} + aA_{PN}A_{BN} + aA_{PB}A_{BN} + aA_{PN}A_{BE} + A_{PN}A_{PB}b + A_{PN}A_{BN}b + A_{PB}A_{BN}b + A_{PN}A_{BE}b + A_{PB}A_{BE}b + A_{PN}A_{PB}A_{BE}[O_2]_E + A_{PN}A_{BN}A_{BE}[O_2]_E + A_{PB}A_{BN}A_{BE}[O_2]_E)}{((A_{PN}A_{PB} + A_{PN}A_{BN} + A_{PB}A_{BN})A_{BE})} \quad [\text{eq. S12}]$$

$$[O_2]_B = \frac{a + b + A_{BE} + [O_2]_E}{A_{BE}} \quad [\text{eq. S13}]$$

16 where  $b = -F_{Res}^N Y^{O_2:C}$ . The solution for  $[O_2]_N$  is greater than zero, since respiratory protection  
 17 is not sufficient due to a shortage of carbon supply.

18 Computed  $F_{Res}^N$  can be separated into two parts, respiration providing energy for N<sub>2</sub>

19 fixation  $F_{ResN_2}$ , and respiratory protection  $F_{RP}$ :

$$F_{Res}^N = F_{ResN_2} + F_{RP} \quad [\text{eq. S14}]$$

20  $F_{ResN_2}$  is proportional to the rate of N<sub>2</sub> fixation:

$$F_{ResN_2} = F_{Nfix} Y_{Res}^{C:N} \quad [\text{eq. S15}]$$

21 where  $Y_{Res}^{C:N}$  is obtained based on the energetic balance (1–3).  $F_{RP}$  is obtained from [eq. S14] with

22  $F_{Res}^N$  and  $F_{ResN_2}$ .

23 In this model, we use  $s^{-1}$  for the unit of a diffusion coefficient  $A_{ij}$ . To convert it to a  
 24 widely used unit ( $m^2 s^{-1}$ ), we used a typical size of *Trichodesmium*; the conversion is done based  
 25 on a typical size (diameter of  $9.670 \mu m$  and length of  $554.145 \mu m$ ) and membrane thickness  
 26 ( $0.076 \mu m$ ) of *Trichodesmium*. Diameter and membrane thickness are estimated from  
 27 microscopic images of cross sections of *Trichodesmium* (4). To estimate the total length of a  
 28 trichome, the length of one cell is estimated from a microscopic image of *Trichodesmium*  
 29 ( $9.23575 \mu m$ ) (5), and we multiplied this number by 60 a typical number of cells in a trichome  
 30 (5).

31 We assumed a cylinder for the shape of a trichome and diffusive flux (normalized by  
 32 volume) into the cell from the surface of the membrane can be described as follows (6):

$$J_{O_2} = \frac{-2\pi D_{O_2} \varepsilon_m L}{V} \left( \ln \left( \frac{R}{R + L_g} \right) \right)^{-1} ([O_2]_{out} - [O_2]_{in}) \quad [\text{eq. S16}]$$

33 where  $D_{O_2}$  is the diffusivity of water  $\varepsilon_m$  is the diffusivity of the membrane layer relative to  
 34 water,  $L$  is the length of a part of cylinder of which we estimate the flux (either the total length of  
 35 photosynthetic cells or non-photosynthetic cells),  $V$  is the total volume of the trichome,  $R$  is the  
 36 radius of the cytoplasmic space,  $L_g$  is the thickness of the cell membrane layer, and  $[O_2]_{out}$  and  
 37  $[O_2]_{in}$  are  $O_2$  concentration right outside/inside of the membrane, respectively. Our model is a  
 38 simplified version of [eq. S16] with a diffusion coefficient of  $A$ :

$$A = \frac{-2\pi D_{O_2} \varepsilon_m L}{V} \left( \ln \left( \frac{R}{R + L_g} \right) \right)^{-1} \quad [\text{eq. S17}]$$

39 and this equation is used for the conversion between  $A$  and  $D_{O_2} \varepsilon_m$  for fluxes between cells and  
 40 boundary layers. Here we note that the units of both sides are  $s^{-1}$ .

41 The  $O_2$  flux from photosynthetic cells to non-photosynthetic cells (normalized by  $V$ ) is  
 42 represented as 1D diffusion:

$$J_{O_2}^{PN} = \frac{2\pi R^2 D_{O_2} \varepsilon_m}{V L_g} ([O_2]_P - [O_2]_N) \quad [\text{eq. S18}]$$

43 which assumes typical 2 diazocytes per trichome (5) with double cellular membranes between  
 44 cells. Our model simplifies [eq. S18] with

$$A_{PN} = \frac{2\pi R^2 D_{O_2} \varepsilon_m}{V L_g} \quad [\text{eq. S19}]$$

45 and it is used for the conversion between  $A_{PN}$  and  $D_{O_2} \varepsilon_m$ . The units of both sides are  $s^{-1}$ .

46

## 47 References

- 48 1. **Rittmann BE, McCarty PL.** 2001. Environmental Biotechnology: Principles and  
 49 Applications. McGraw-Hill: New York, NY.
- 50 2. **Inomura K, Bragg J, Follows MJ.** 2017. A quantitative analysis of the direct and  
 51 indirect costs of nitrogen fixation: a model based on *Azotobacter vinelandii*. ISME J  
 52 **11**:166–175.
- 53 3. **Inomura K, Bragg J, Riemann L, Follows MJ.** 2018. A quantitative model of nitrogen  
 54 fixation in the presence of ammonium. PLOS ONE **13**:e0208282.  
 55 <https://doi.org/10.1371/journal>.
- 56 4. **Carpenter EJ, O’Neil JM, Dawson R, Capone DG, Siddiqui PJA, Roenneberg T,**  
 57 **Bergman B.** 1993. The tropical diazotrophic phytoplankter *Trichodesmium*: biological  
 58 characteristics of two common species. Mar Ecol Prog Ser **95**:295–304.
- 59 5. **El-Shehawy R, Lugomela C, Ernst A, Bergman B.** 2003. Diurnal expression of *hetR*  
 60 and diazocyte development in the filamentous non-heterocystous cyanobacterium  
 61 *Trichodesmium erythraeum*. Microbiology **149**:1139–1146.
- 62 6. **Staal M, Meysman FJR, Stal LJ.** 2003. Temperature excludes N<sub>2</sub>-fixing heterocystous  
 63 cyanobacteria in the tropical oceans. Nature **425**:504–507.
