# Supplementary material for: Mechanistic Model for the Coexistence of Nitrogen Fixation and Photosynthesis in Marine Trichodesmium
Source: PubMed Central journal article supplement (PMC6687940; doi:10.1128/msystems.00210-19), 2019-08-06
Supplement: mSystems.00210-19-sf001.pdf [file mSystems.00210-19-sf001.pdf]

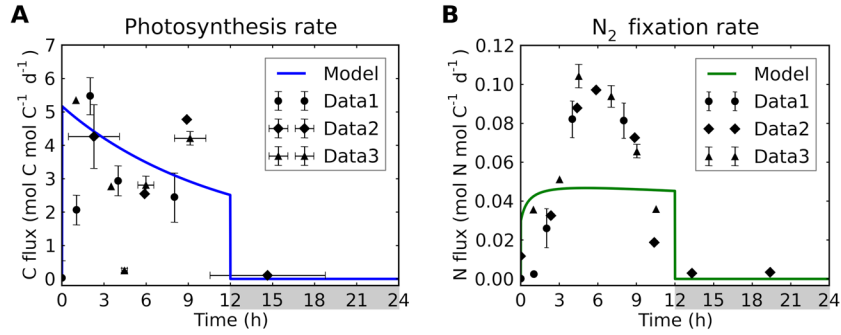

## References

1. **Finzi-hart JA, Pett-Ridge J, Weber PK, Popa R, Fallon SJ, Gunderson T, Hutcheon ID, Nealon KH, Capone DG.** 2009. Fixation and fate of C and N in the cyanobacterium *Trichodesmium* using nanometer-scale secondary ion mass spectrometry. *Proc Natl Acad Sci* **106**:6345–6350.
2. **Berman-Frank I, Lundgren P, Chen Y-B, Küpper H, Kolber Z, Bergman B, Falkowski P.** 2001. Segregation of nitrogen fixation and oxygenic photosynthesis in the marine cyanobacterium *Trichodesmium*. *Science* **294**:1534–1537.
