# Supplementary material for: Mechanistic Model for the Coexistence of Nitrogen Fixation and Photosynthesis in Marine Trichodesmium
Source: PubMed Central journal article supplement (PMC6687940; doi:10.1128/msystems.00210-19), 2019-08-06
Supplement: mSystems.00210-19-st001.pdf [file mSystems.00210-19-st001.pdf]

| Parameter           | Unit                                | Definition                                                           |
|---------------------|-------------------------------------|----------------------------------------------------------------------|
| $F_{Nfix}$          | $\text{mol m}^{-3} \text{ s}^{-1}$  | $\text{N}_2$ fixation rate                                           |
| $F_{Nfix}^{max}$    | $\text{mol m}^{-3} \text{ s}^{-1}$  | Maximum $\text{N}_2$ fixation rate                                   |
| $[O_2]_P$           | $\text{mol m}^{-3}$                 | $\text{O}_2$ concentration in photosynthetic cells ( $P$ )           |
| $[O_2]_N$           | $\text{mol m}^{-3}$                 | $\text{O}_2$ concentration in non-photosynthetic cells ( $N$ )       |
| $[O_2]_B$           | $\text{mol m}^{-3}$                 | $\text{O}_2$ concentration in boundary layers ( $B$ )                |
| $[O_2]_E$           | $\text{mol m}^{-3}$                 | $\text{O}_2$ concentration in the environment ( $E$ )                |
| $[O_2]_{crit}$      | $\text{mol m}^{-3}$                 | Critical oxygen concentration                                        |
| $C_{Sto}$           | $\text{mol m}^{-3}$                 | C storage                                                            |
| $C_{Sto}^N$         | $\text{mol m}^{-3}$                 | C storage per total volume of non-photosynthetic cells in a trichome |
| $C_{Sto}^{max}$     | $\text{mol m}^{-3}$                 | maximum C storage                                                    |
| $K_C$               | $\text{mol m}^{-3}$                 | Half saturation constant of C storage                                |
| $N_{Sto}$           | $\text{mol m}^{-3}$                 | N storage                                                            |
| $N_{Sto}^{max}$     | $\text{mol m}^{-3}$                 | Maximum N storage                                                    |
| $K_N$               | $\text{mol m}^{-3}$                 | Half saturation constant of N storage                                |
| $t$                 | s                                   | Time                                                                 |
| $F_{Cfix}$          | $\text{mol m}^{-3} \text{ s}^{-1}$  | C fixation rate                                                      |
| $F_{Bio}$           | $\text{mol m}^{-3} \text{ s}^{-1}$  | Biomass production rate                                              |
| $Y_{Nfix}^{C:N}$    | $\text{mol mol}^{-1}$               | C:N of $\text{N}_2$ fixation                                         |
| $F_{Res}$           | $\text{mol m}^{-3} \text{ s}^{-1}$  | Respiration rate                                                     |
| $Y_{Bio}^{N:C}$     | $\text{mol mol}^{-1}$               | N:C of biomass                                                       |
| $V_P$               | $\text{m}^3$                        | Total volume of photosynthetic cells in a trichome                   |
| $V_N$               | $\text{m}^3$                        | Total volume of non-photosynthetic cells in a trichome               |
| $V_B$               | $\text{m}^3$                        | Volume of boundary layers                                            |
| $V$                 | $\text{m}^3$                        | Volume of a trichome                                                 |
| $J_{O_2}^{ij}$      | $\text{mol m}^{-3} \text{ s}^{-1}$  | $\text{O}_2$ flux from $i$ to $j$ . $i, j = P, N, B, E$              |
| $Y^{O_2:C}$         | $\text{mol O}_2 \text{ mol C}^{-1}$ | $\text{O}_2$ :C in respiration and photosynthesis                    |
| $F_{Res}^P$         | $\text{mol m}^{-3} \text{ s}^{-1}$  | Respiration rate in photosynthetic cells                             |
| $F_{Res}^N$         | $\text{mol m}^{-3} \text{ s}^{-1}$  | Respiration rate in non-photosynthetic cells                         |
| $F_{Bio}^{max}$     | $\text{mol m}^{-3} \text{ s}^{-1}$  | Maximum biomass production rate                                      |
| $F_{Cfix}^{Chl}$    | $\text{mol m}^{-3} \text{ s}^{-1}$  | C fixation rate per chlorophyll C                                    |
| $F_{CfixMax}^{Chl}$ | $\text{mol}^{-1}$                   |                                                                      |
|                     | $\text{mol m}^{-3} \text{ s}^{-1}$  | Maximum C fixation rate per chlorophyll C                            |
|                     | $\text{mol}^{-1}$                   |                                                                      |

|                     |                                              |                                                                                |
|---------------------|----------------------------------------------|--------------------------------------------------------------------------------|
| $K_I$               | $\mu \text{ mol}^{-1} \text{ m}^2 \text{ s}$ | Light saturation coefficient                                                   |
| $I$                 | $\mu \text{ mol m}^{-2} \text{ s}^{-1}$      | Light intensity                                                                |
| $f_P$               | dimensionless                                | Fraction of photosynthetic cells                                               |
| $f_N$               | dimensionless                                | Fraction of non-photosynthetic cells                                           |
| $f_{NITROGE}$       | dimensionless                                | Fraction of cells with nitrogenase among non-photosynthetic cells              |
| $Chl_P$             | $\text{mol m}^{-3}$                          | Chlorophyll in photosynthetic cells                                            |
| $Chl_{full}$        | $\text{mol m}^{-3}$                          | Chlorophyll in a trichome                                                      |
| $\gamma^{Res:Bio}$  | $\text{mol mol}^{-1}$                        | Respiration for biomass production : Biomass production                        |
| $\mu_{max}$         | $\text{s}^{-1}$                              | Maximum growth rate                                                            |
| $F_{Cfix}^{Qc}$     | $\text{s}^{-1}$                              | C fixation rate per cellular carbon quota                                      |
| $\gamma^{Bio:Cfix}$ | $\text{mol mol}^{-1}$                        | Biomass yield of production                                                    |
| $Q_C$               | $\text{mol m}^{-3}$                          | Cellular C quota                                                               |
| $F_{RP}$            | $\text{mol m}^{-3} \text{ s}^{-1}$           | Respiratory protection                                                         |
| $F_{ResN_2}$        | $\text{mol m}^{-3} \text{ s}^{-1}$           | Respiration for $\text{N}_2$ fixation                                          |
| $\gamma^{Res:Nfix}$ | $\text{mol mol}^{-1}$                        | Respiration for $\text{N}_2$ fixation: C consumption for $\text{N}_2$ fixation |
| $J_{O_2}$           | $\text{mol m}^{-3} \text{ s}^{-1}$           | $\text{O}_2$ flux between cells and boundary layer                             |
| $D_{O_2}$           | $\text{m}^2 \text{ s}^{-1}$                  | Diffusion coefficient of water                                                 |
| $\epsilon_m$        | dimensionless                                | Diffusion coefficient of cell membrane layers : diffusion coefficient of water |
| $L$                 | m                                            | Length of a cylinder for $J_{O_2}$                                             |
| $R$                 | m                                            | Radius of cytoplasm                                                            |
| $L_g$               | m                                            | Thickness of the cell membrane layers                                          |
| $[O_2]_{out}$       | $\text{mol m}^{-3}$                          | Oxygen concentration right outside of the cell membrane                        |
| $[O_2]_{in}$        | $\text{mol m}^{-3}$                          | Oxygen concentration of cytoplasm                                              |
| $A$                 | $\text{s}^{-1}$                              | Diffusion coefficient of oxygen through cell membrane layers                   |

---

The volume of a trichome is used for normalization unless stated otherwise.
