# Supplementary material for: Mechanistic Model for the Coexistence of Nitrogen Fixation and Photosynthesis in Marine Trichodesmium
Source: PubMed Central journal article supplement (PMC6687940; doi:10.1128/msystems.00210-19), 2019-08-06
Supplement: mSystems.00210-19-st002.pdf [file mSystems.00210-19-st002.pdf]

| Parameter        | Value | Unit                                 | Explanations                                                                                                                                                               |
|------------------|-------|--------------------------------------|----------------------------------------------------------------------------------------------------------------------------------------------------------------------------|
| $[O_2]_E$        | 0.213 | mol O <sub>2</sub> m <sup>-3</sup>   | Saturated concentration at 25 °C and salinity of 34 (1).                                                                                                                   |
| $Y_{Nfix}^{C:N}$ | 1     | mol mol <sup>-1</sup>                | (2)(3).                                                                                                                                                                    |
| $Y_{Bio}^{N:C}$  | 0.159 | mol mol <sup>-1</sup>                | (4).                                                                                                                                                                       |
| $I$              | 400   | μmol m <sup>-2</sup> s <sup>-1</sup> | Boundary condition.                                                                                                                                                        |
| $Y^{Res:Bio}$    | 0.4   | mol mol <sup>-1</sup>                | Based on energetic balance (5)(2) with energy transfer efficiency of 0.6 (5) With biomass stoichiometry of C <sub>5</sub> H <sub>7</sub> O <sub>2</sub> N <sub>0.8</sub> . |
| $Y^{Res:Nfix}$   | 1.04  | mol mol <sup>-1</sup>                |                                                                                                                                                                            |
| $Q_C$            | 18333 | mol m <sup>-3</sup>                  | (6).                                                                                                                                                                       |

The parameters are listed roughly in order of appearance in Methods and Supplementary Methods.

## References

1. **Benson BB, Krause D.** 1984. The concentration and isotopic fractionation of oxygen dissolved in freshwater and seawater in equilibrium with the atmosphere. *Limnol Oceanogr* **29**:620–632.
2. **Inomura K, Bragg J, Follows MJ.** 2017. A quantitative analysis of the direct and indirect costs of nitrogen fixation: a model based on *Azotobacter vinelandii*. *ISME J* **11**:166–175.
3. **Inomura K, Bragg J, Riemann L, Follows MJ.** 2018. A quantitative model of nitrogen fixation in the presence of ammonium. *PLOS ONE* **13**:e0208282. <https://doi.org/10.1371/journal>.
4. **LaRoche J, Breitbarth E.** 2005. Importance of the diazotrophs as a source of new nitrogen in the ocean. *J Sea Res* **53**:67–91.
5. **Rittmann BE, McCarty PL.** 2001. *Environmental Biotechnology: Principles and Applications*. McGraw-Hill: New York, NY.
6. **Bratbak G, Dundas I.** 1984. Bacterial dry matter content and biomass estimations. *Appl Environ Microbiol* **48**:755–757.
