# Supplementary material for: Mechanistic Model for the Coexistence of Nitrogen Fixation and Photosynthesis in Marine Trichodesmium
Source: PubMed Central journal article supplement (PMC6687940; doi:10.1128/msystems.00210-19), 2019-08-06
Supplement: mSystems.00210-19-st003.pdf [file mSystems.00210-19-st003.pdf]

| Parameter           | Value                       | Unit                                    |
|---------------------|-----------------------------|-----------------------------------------|
| $f_N$               | 0.2 (0.45 $t = 3 \sim 9$ h) | dimensionless                           |
| $F_{Nfix}^{full}$   | 0.21                        | mol m <sup>-3</sup> s <sup>-1</sup>     |
| $[O_2]_{crit}$      | 0.1                         | mol O <sub>2</sub> m <sup>-3</sup>      |
| $K_C$               | 3667                        | mol m <sup>-3</sup>                     |
| $f_{NITROGE}$       | 0.4                         | dimensionless                           |
| $C_{Sto} (t = 0)$   | 1000                        | mol m <sup>-3</sup>                     |
| $N_{Sto} (t = 0)$   | 1000                        | mol m <sup>-3</sup>                     |
| $A_{PB}$            | $3.6 \times f_P$            | s <sup>-1</sup>                         |
| $A_{PN}$            | 0.062                       | s <sup>-1</sup>                         |
| $A_{BN}$            | $3.6 \times f_N$            | s <sup>-1</sup>                         |
| $A_{BE}$            | 3.6                         | s <sup>-1</sup>                         |
| $F_{Bio}^{max}$     | 0.053                       | mol m <sup>-3</sup> s <sup>-1</sup>     |
| $F_{CfixMax}^{Chl}$ | 0.00268                     | mol mol C <sup>-1</sup> s <sup>-1</sup> |
| $K_I$               | 0.01                        | μmol m <sup>-2</sup> s <sup>-1</sup>    |
| $Chl_{full}$        | 535                         | mol C m <sup>-3</sup>                   |
| $C_{Sto}^{max}$     | 36666                       | mol m <sup>-3</sup>                     |
| $F_{Res}^{NmaxC}$   | 10.6                        | mol m <sup>-3</sup> s <sup>-1</sup>     |

The parameters are listed roughly in order of appearance in Methods and Supplementary Methods.
